# Supplementary material for: Multifunctional Zn doped hollow mesoporous silica/polycaprolactone electrospun membranes with enhanced hair follicle regeneration and antibacterial activity for wound healing
Source: Royal Society of Chemistry journal article supplement (doi:10.1039/c8nr09818b), 2019-01-01
Supplement: c8nr09818b1.pdf [file c8nr09818b1.pdf]

## Supplementary Information

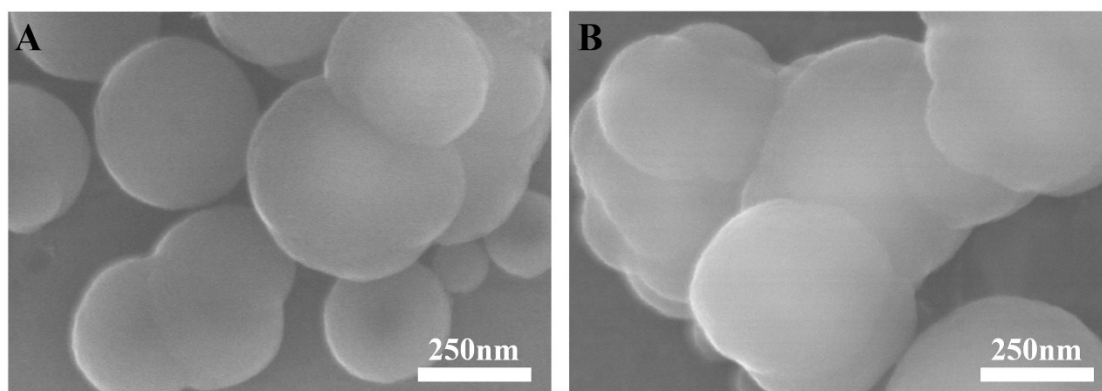

**Figure.S1.** SEM images of HM20ZS (A) and HM30ZS (B).

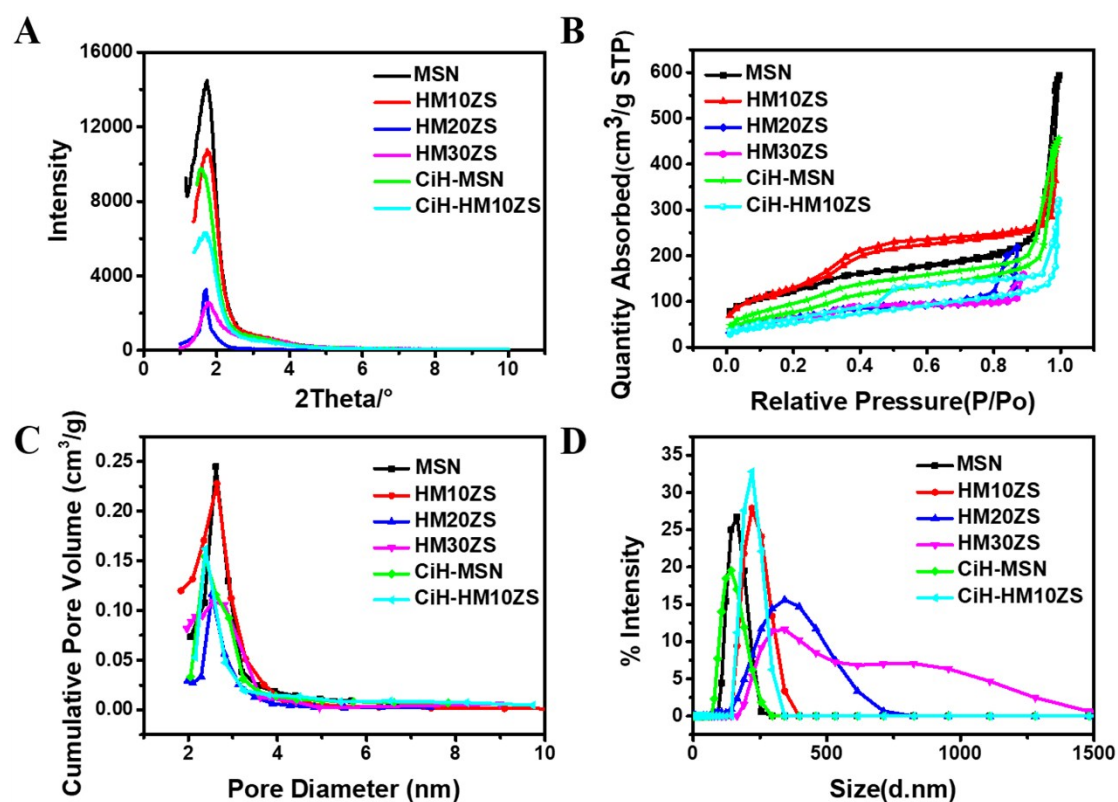

**Figure.S2.** The characterization of MSN, HMZS (with 10, 20 and 30 mol% Zn), CiH-MSN and CiH-HM10ZS. (A) SAXRD spectrum, (B) N<sub>2</sub> absorption-desorption isotherm, (C) mesopore pore size distribution, (D) the hydrated dynamic particle size distribution.

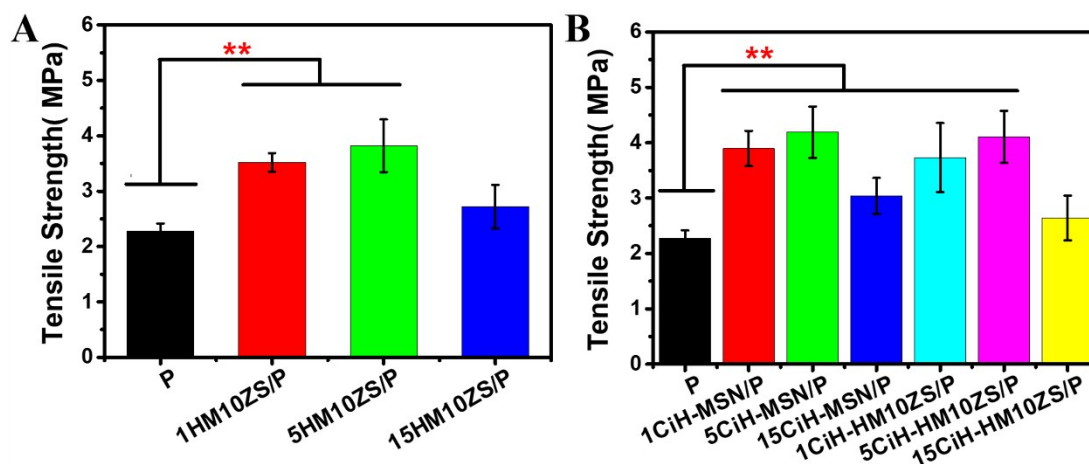

**Figure.S3.** The tensile strength of the PCL incorporated with different amount of HM10ZS (A); The tensile strength of PCL incorporated with different amount of CiH loaded nanospheres (MSN and HM10ZS) (B) (\*\* $P < 0.01$ ).

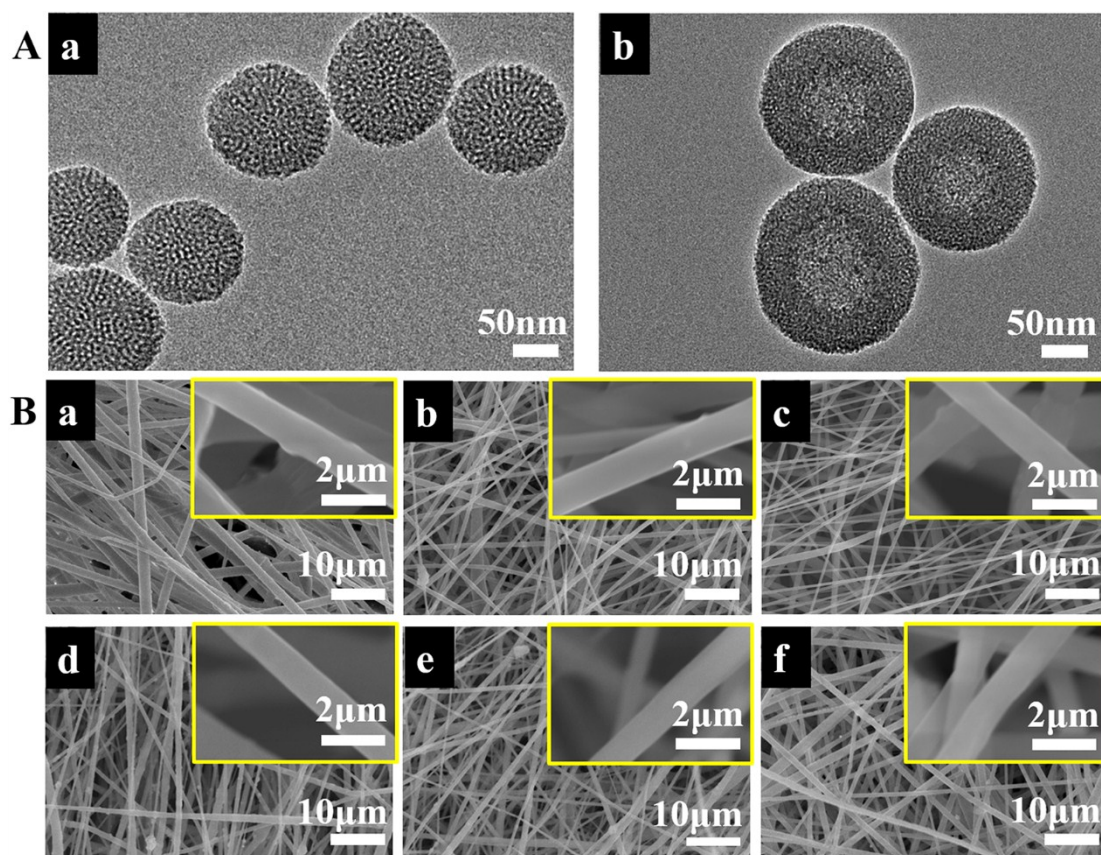

**Figure.S4.** (A) TEM images of CiH-MSN (a) and CiH-HM10ZS (b); (B) SEM images of CiH-MSN/P nano-composite membranes (a:1CiH-MSN/P, b:5CiH-MSN/P, c: 15CiH-MSN/P) and SEM images of CiH-HM10ZS/P nano-composites membranes (d:1CiH-HM10ZS/P, e:5CiH-HM10ZS/P, f:15CiH-HM10ZS/P).

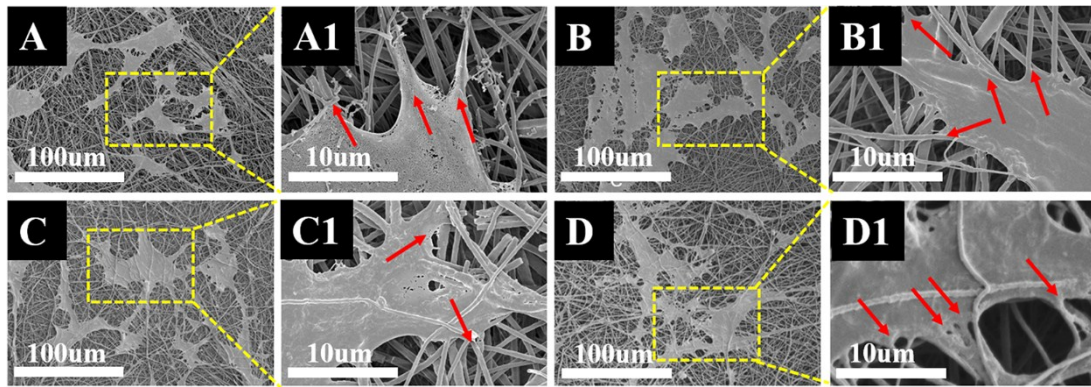

**Figure.S5.** SEM images of HUVECs after 1 day of growth on PCL nano-composite membranes (A-A1: 1HM10ZS/P; B-B1: P); and HDFs after 1 day of growth on PCL membranes (C-C1: 1HM10ZS/P; D-D1: P). Red arrows in images represent cell tentacles of HUVECs (A1-B1) or HDFs (C1-D1).



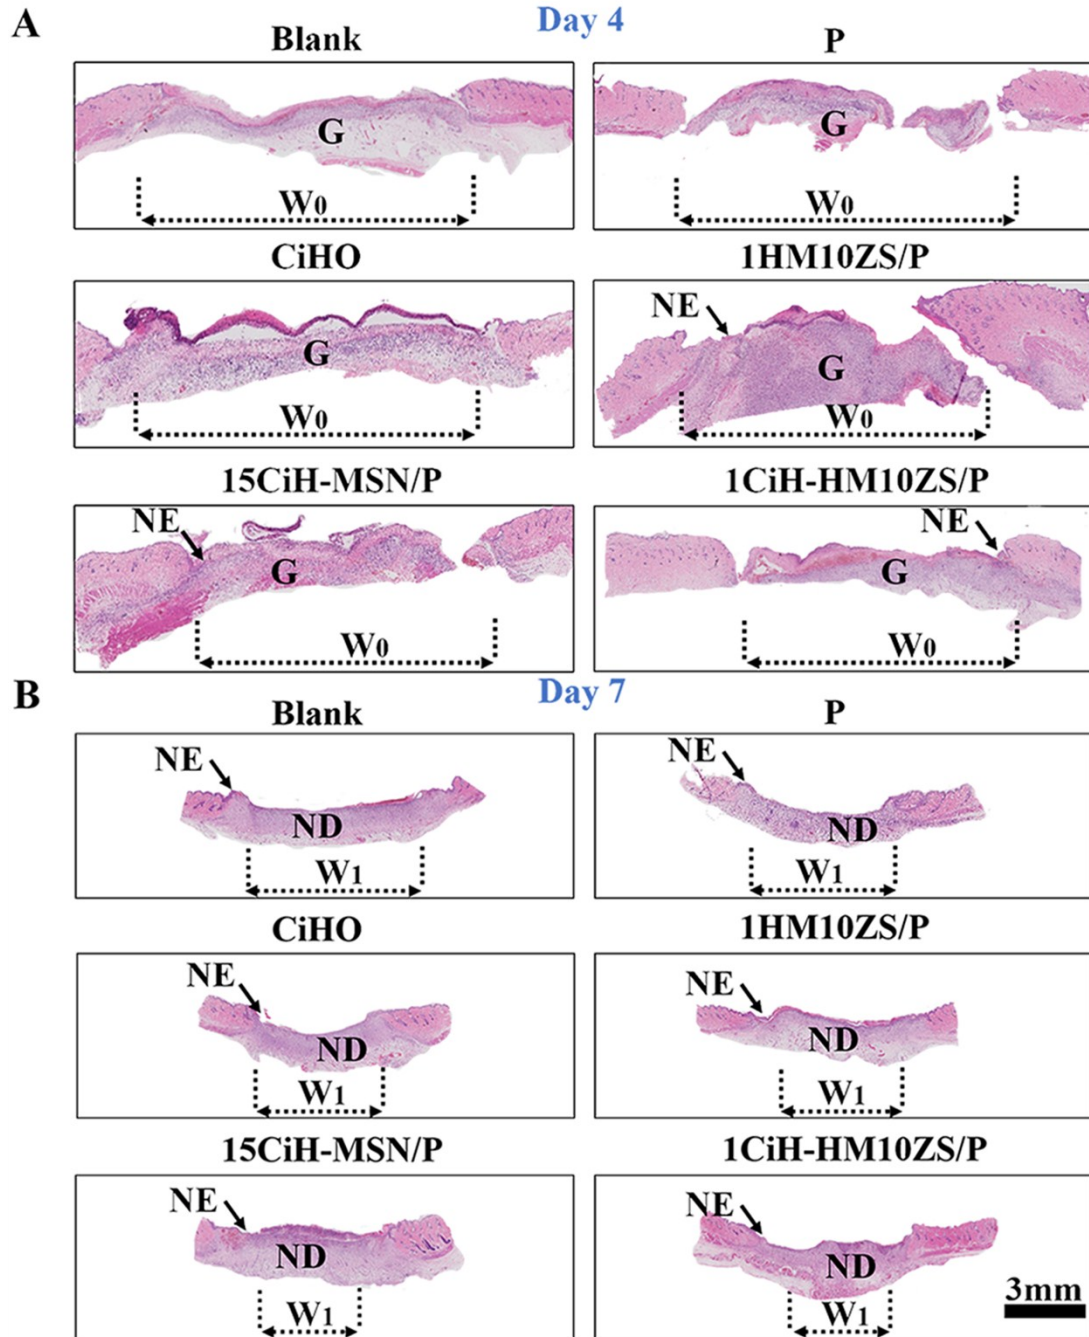

**Figure.S6.** The H&E staining of whole wounds sections after 4 days (A) and 7 days (B) of treatment with PCL composite membranes (W0: wound of day 4; W1: wound of day 7; G: granulation tissue; NE: Newly formed epidermis; ND: Newly formed dermis).

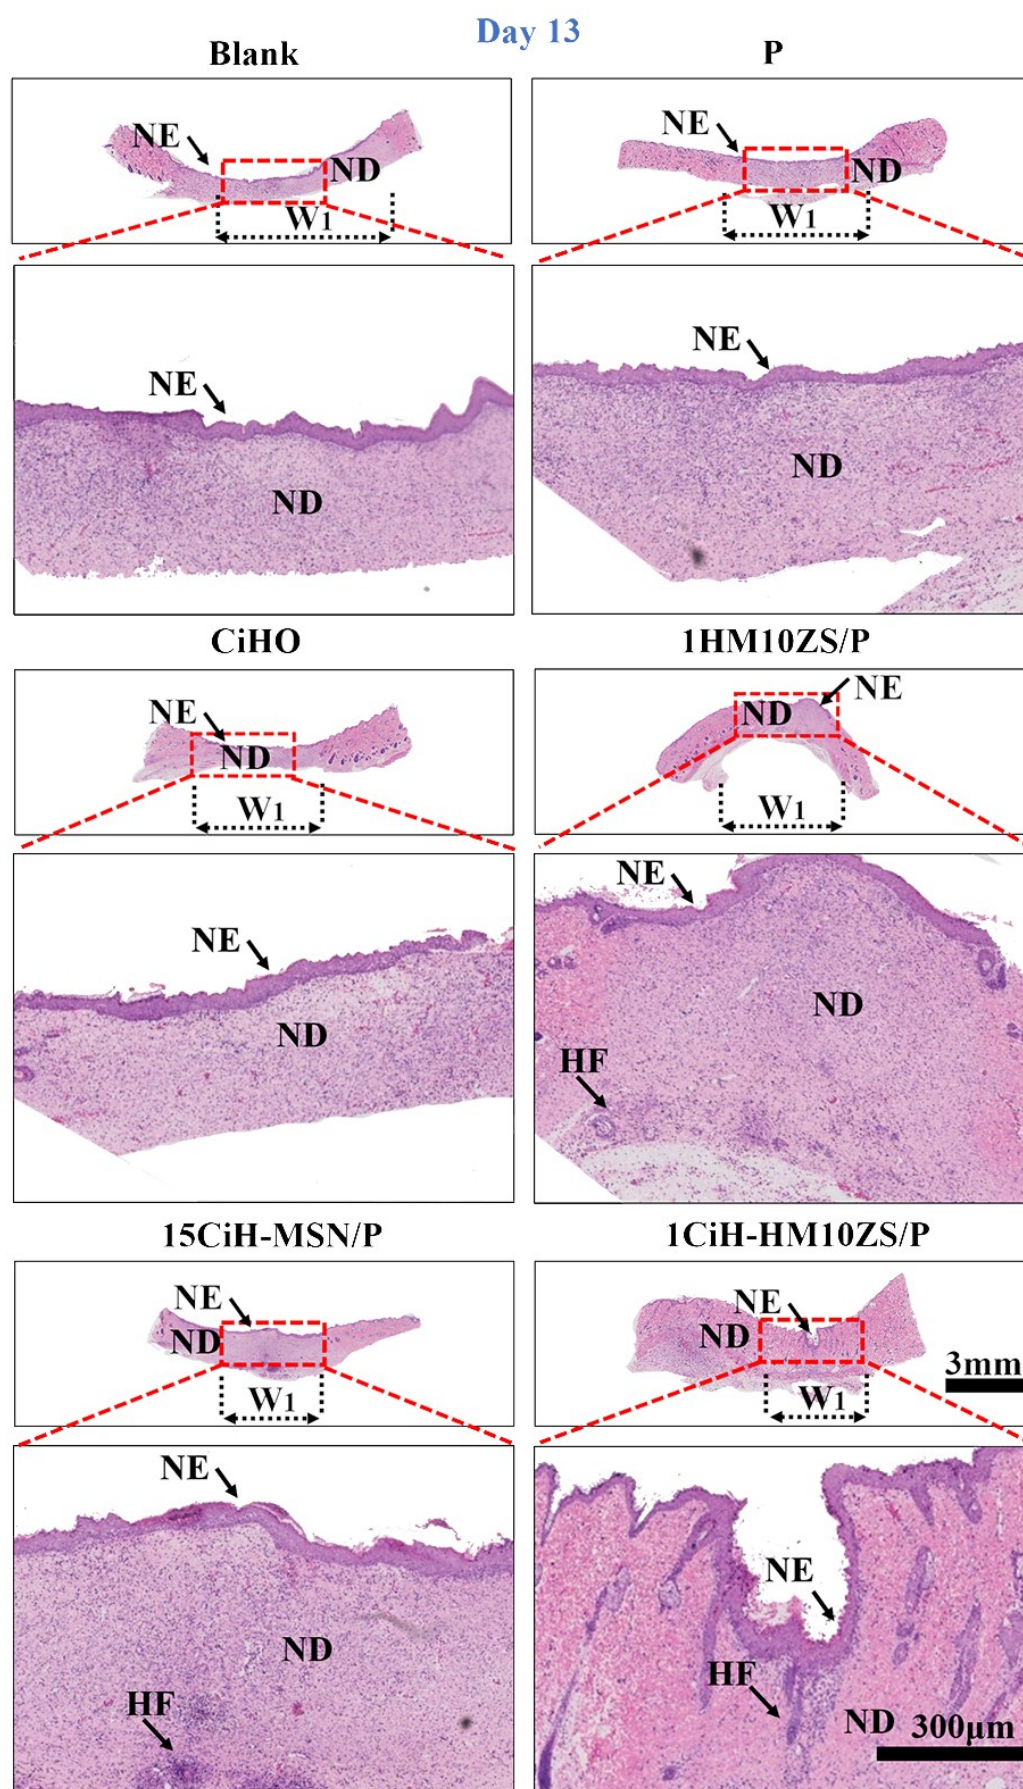

**Figure.S7.** The H&E staining of whole wounds sections after 13 days of treatment with



PCL nano-composite membranes (W1: wound of day 7; NE: Newly formed epidermis; ND: Newly formed dermis; NF: Newly formed hair follicle).

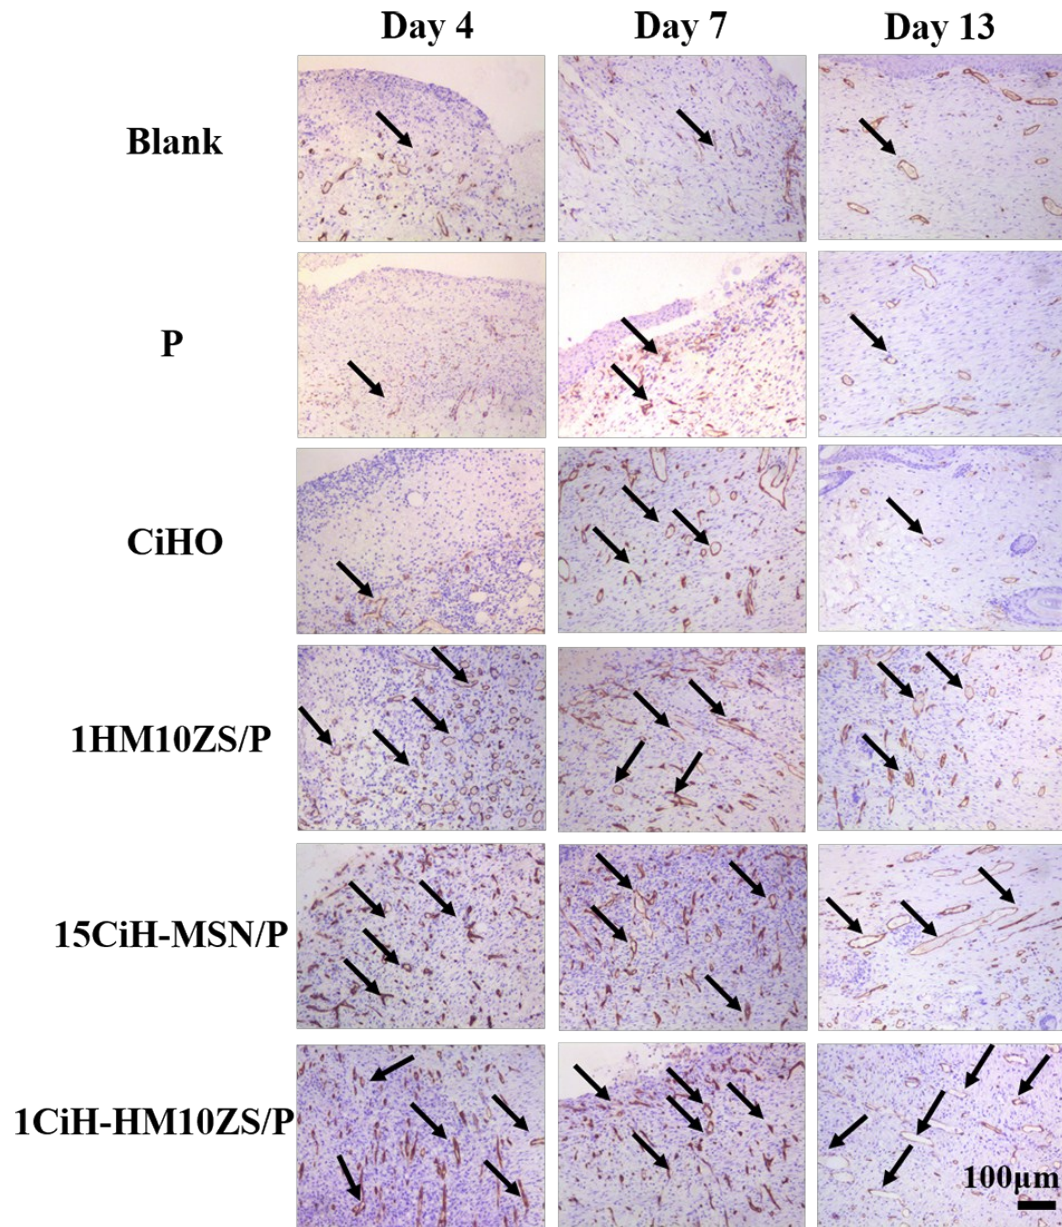

**Figure.S8.** Immunohistochemical staining of CD31 on wound area sections at day 4, day 7 and day 13 (Black arrows indicated blood vessels).

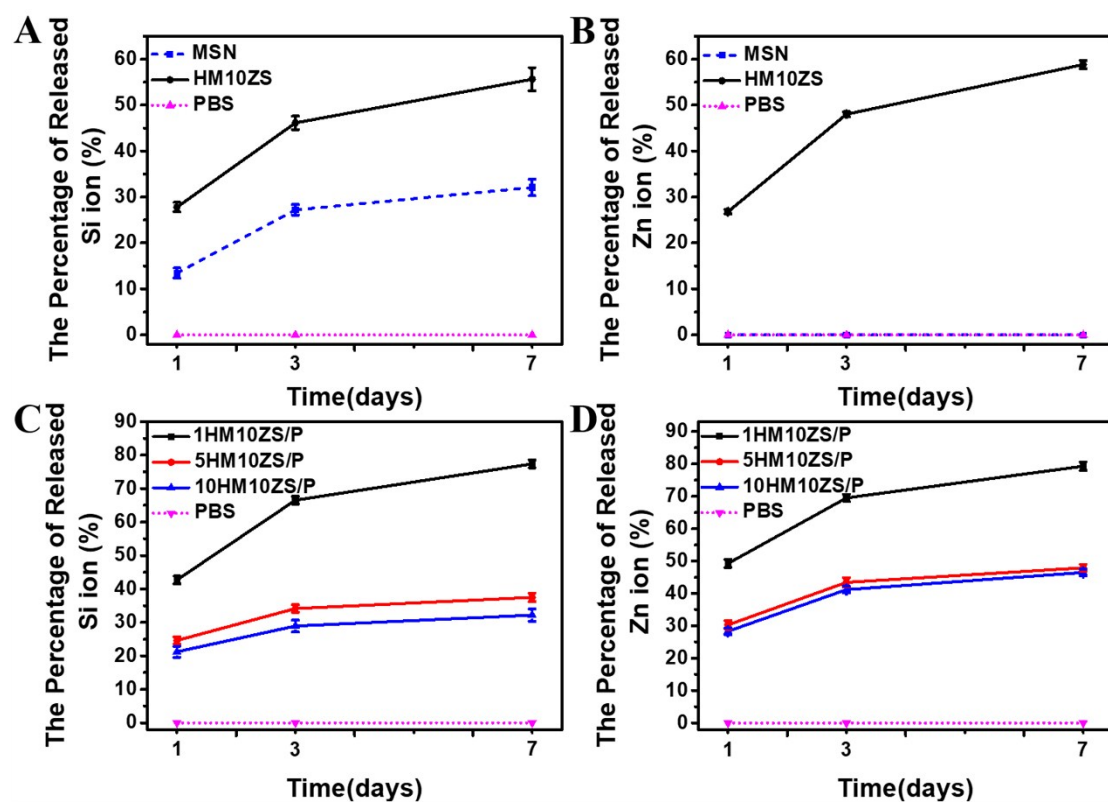

**Figure.S9.** The percentage of released Si ion (A) and Zn ion (B) of MSN and HM10ZS in PBS; The percentage of released Si ion (C) and Zn ion (D) released from (1, 5, 15) HM10ZS/P nanocomposite membranes in PBS.

**Table S1** The molar percentage of Zn in HMZS by ICP-AES analysis, the Zeta-potential, the poly dispersive index (PDI) and the hydrated dynamic particle size by dynamic light scattering analysis.

| Particles  | Zn (%) | Zeta-potential (mv) | PDI   | Hydrated dynamic particle size (nm) |
|------------|--------|---------------------|-------|-------------------------------------|
| MSN        | ---    | -19.20              | 0.376 | 159.80                              |
| HM10ZS     | 7.50   | -14.80              | 0.380 | 256.60                              |
| HM20ZS     | 15.08  | -12.60              | 0.694 | 348.00                              |
| HM30ZS     | 19.20  | -10.30              | 0.730 | 361.60                              |
| CiH-MSN    | ---    | -18.70              | 0.231 | 149.80                              |
| CiH-HM10ZS | 7.50   | -15.20              | 0.250 | 249.20                              |

**Table S2** The Zn ion and CiH concentrations of PCL nano-composite membranes in the antibacterial test for 24 h and the related inhibition rate.

|                   | 1<br>HM<br>10ZS/<br>P | 5<br>HM<br>10ZS<br>/P | 15<br>HM<br>10ZS<br>/P | 1<br>CiH-<br>MSN/P | 5<br>CiH-<br>MSN/P | 15<br>CiH-<br>MSN/P | 1<br>CiH-<br>HM<br>10ZS/P | 5<br>CiH-<br>HM<br>10ZS/P | 15<br>CiH-<br>HM<br>10ZS/P |
|-------------------|-----------------------|-----------------------|------------------------|--------------------|--------------------|---------------------|---------------------------|---------------------------|----------------------------|
| Zn<br>(ppm)       | 1.12±<br>0.19         | 2.57±<br>0.24         | 7.60±<br>0.32          | ---                | ---                | ---                 | 1.43±<br>0.24             | 2.87±<br>0.53             | 10.40±<br>0.67             |
| CiH<br>(ppm)      | ---                   | ---                   | ---                    | 0.11±<br>0.09      | 0.29±<br>0.08      | 0.72±<br>0.10       | 0.75±<br>0.12             | 1.39±<br>0.22             | 4.12±<br>0.57              |
| Inhibition<br>(%) | 14.89<br>±1.92        | 44.68<br>±2.33        | 96.28<br>±0.89         | 6.50<br>±1.72      | 41.49<br>±1.57     | 74.47<br>±2.32      | 99.68<br>±1.19            | 99.89<br>±0.79            | 100.00                     |
